# Supplementary material
Source: Springer Nature journal article supplement (https://www.springermedizin.de/resource/supplementary/12883_2014_1052_MOESM2_ESM.pdf/9456438)

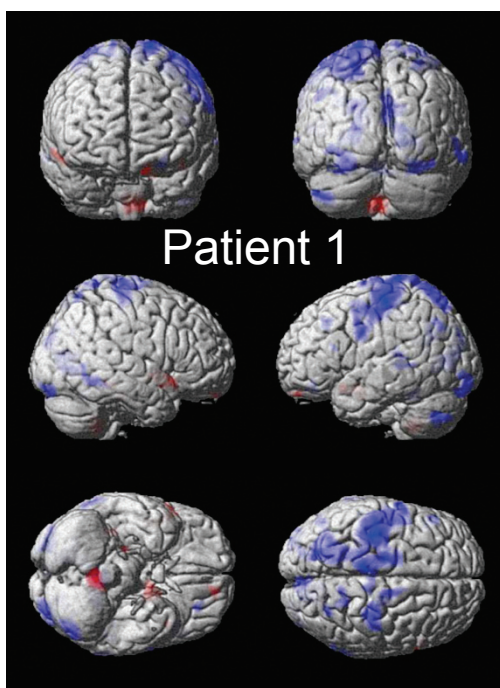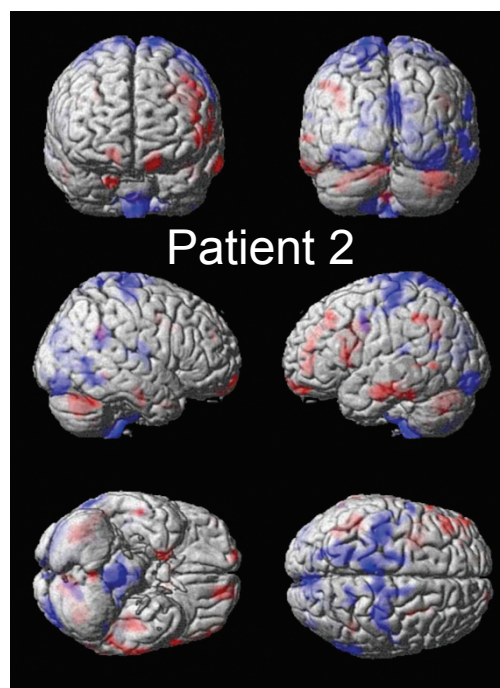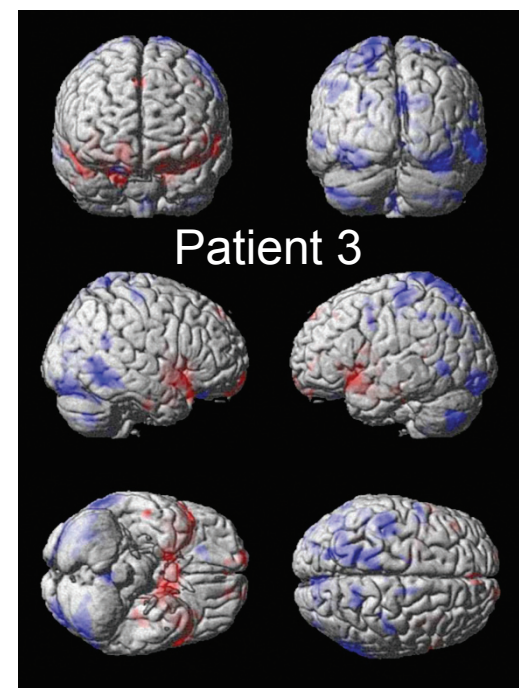

**Anti-NMDA**

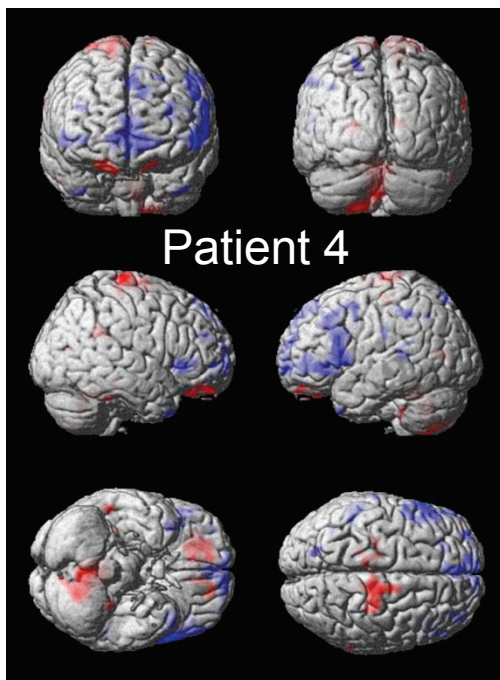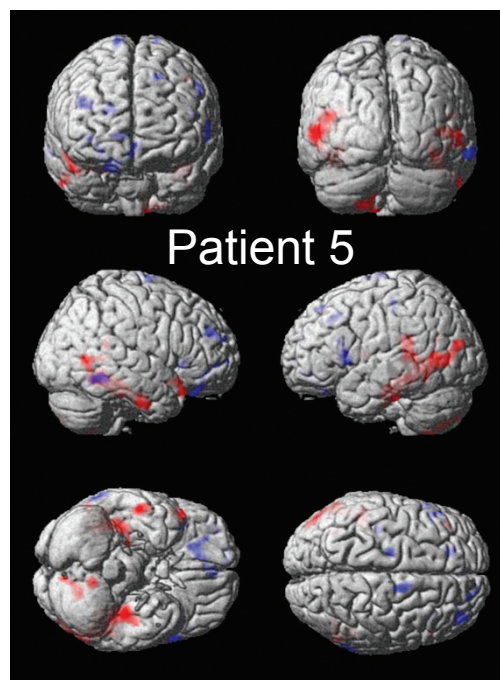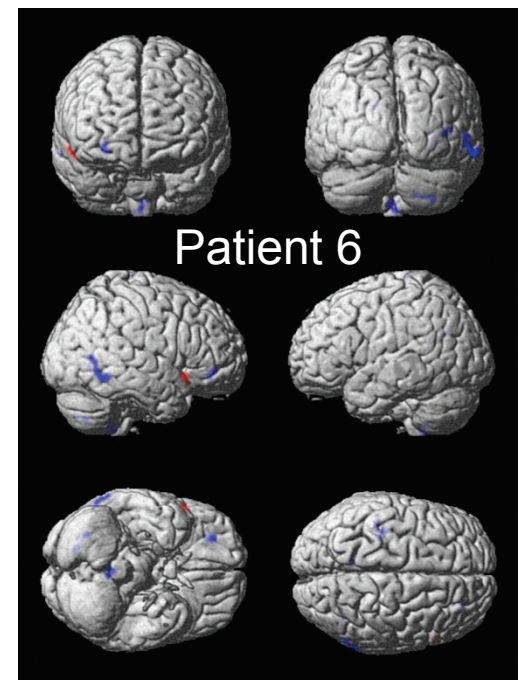

Supplement: MOESM2 [file 9456438]
